# Supplementary material
Source: PubMed Central journal article supplement (PMC7666771)
Supplement: NIHMS1642593-supplement-Supplementary_Figure.pdf [file NIHMS1642593-supplement-Supplementary_Figure.pdf]

Supplemental Figure for  
Source of  $^{12}\text{C}$  in Calvin Benson cycle intermediates and isoprene emitted  
from plant leaves fed with  $^{13}\text{CO}_2$

Thomas D. Sharkey, Alyssa L. Preiser, Sarathi M. Weraduwege, Linus Gog

**Supplemental Figure 1. Replot of data of Szecowka et al. 2013 [1] from Supplemental Table 2 of that paper.** Panel A shows data for Calvin Benson cycle intermediates ribulose 1,5 biphosphate (RuBP), 3-phosphoglyceric acid (3-PGA), the pyruvate precursor 2-phosphoglyceric acid (2-PGA, Starch precursor ADP glucose (ADPG), the sucrose precursor UDP glucose (UDPG), plus free sucrose, fructose, and glucose. The values for RuBP, 3-PGA, 2-PGA, and ADP glucose were averaged and the degree of label was subtracted from 100%. This was plotted on a log scale (Panel B) to illustrate exponential decay.

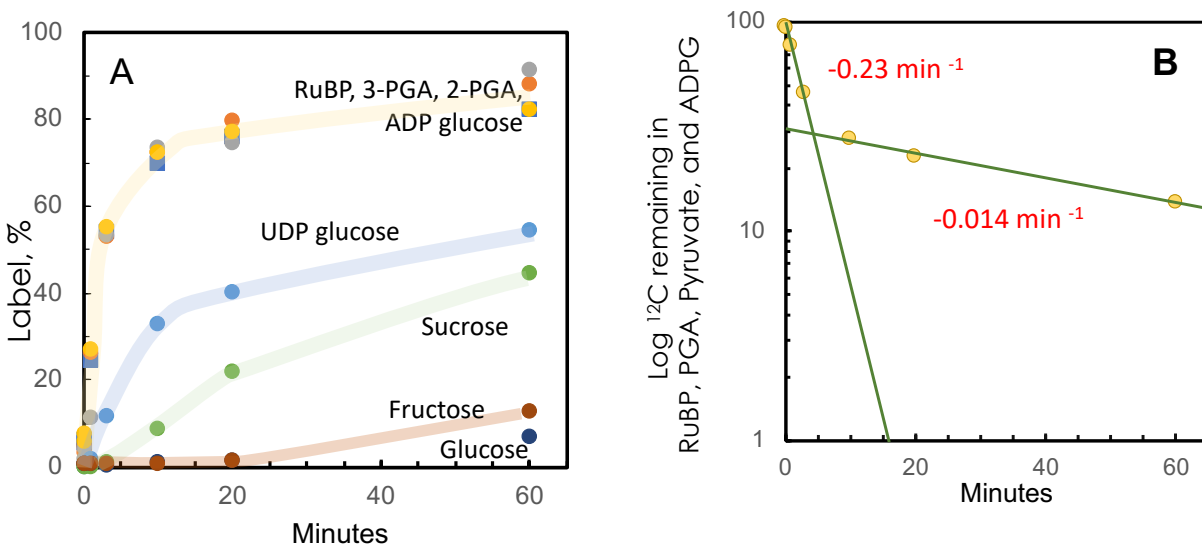

References cited

1. Szecowka M., Heise R., Tohge T., Nunes-Nesi A., Vosloh D., Huege J., Feil R., Lunn J., Nikoloski Z., Stitt M., Fernie A.R., Arrivault S. (2013) Metabolic fluxes in an illuminated *Arabidopsis* rosette. *Plant Cell* **25**, 694-714 10.1105/tpc.112.106989
